# Supplementary material for: A liquid PEDOT:PSS electrode-based stretchable triboelectric nanogenerator for a portable self-charging power source
Source: Royal Society of Chemistry journal article supplement (doi:10.1039/c9nr01271k), 2019-01-01
Supplement: c9nr01271k1.pdf [file c9nr01271k1.pdf]

electronic supplementary information (ESI)

**Liquid PEDOT:PSS Electrode Based Stretchable Triboelectric Nanogenerator  
for Portable Self-Charging Power Source**

*Jihong Shi, Gengfei Li, Na Sun, Hongxue Jiang, Dequan Bao, Lingjie Xie, Mingfa Peng, Yina Liu, Zhen Wen\* and Xuhui Sun\**

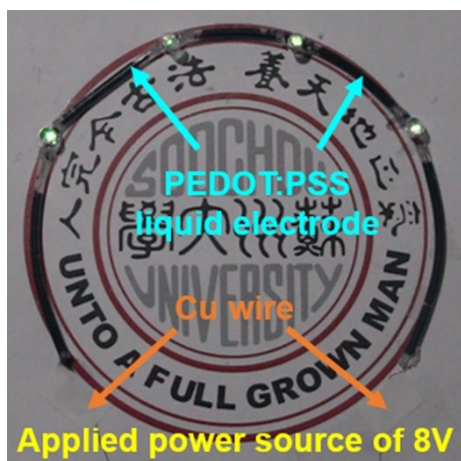

**Figure S1.** Photograph of lighting LEDs connecting with PEDOT:PSS liquid electrode.

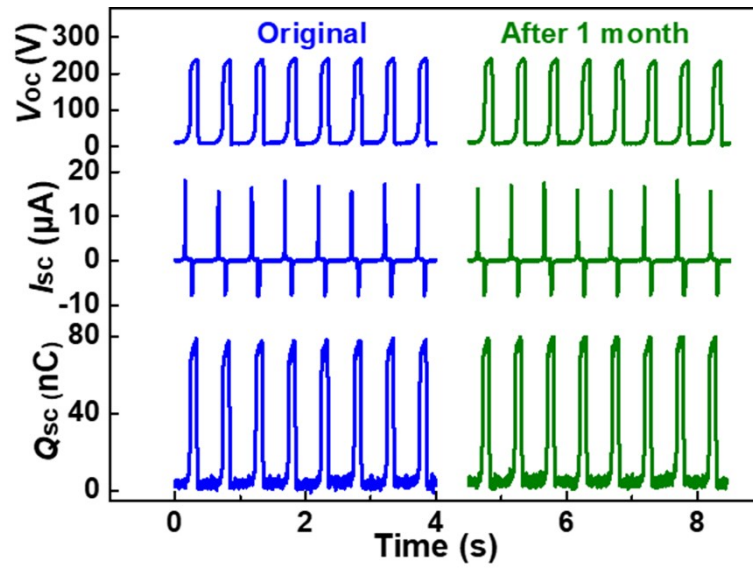

**Figure S2.** Dependence of  $V_{oc}$ ,  $I_{sc}$  and  $Q_{sc}$  of the PL-TENG after leaving for a month.

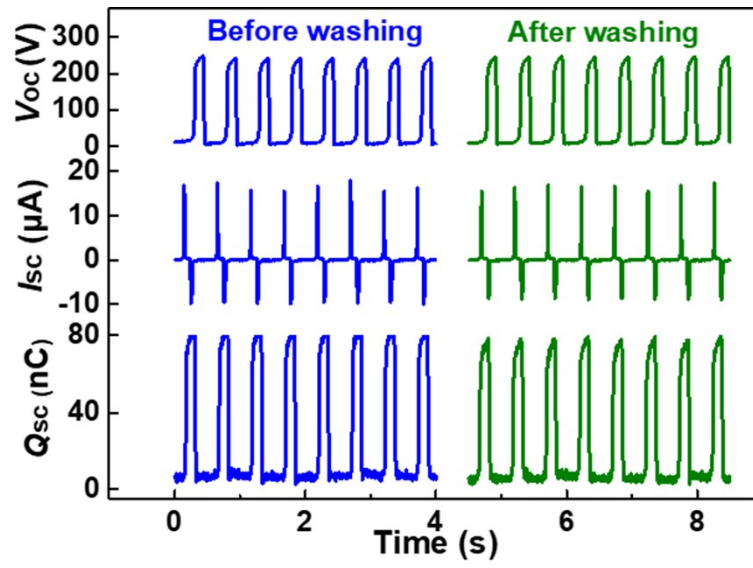

**Figure S3.** Dependence of  $V_{oc}$ ,  $I_{sc}$  and  $Q_{sc}$  of the PL-TENG before and after washing in physiological saline.

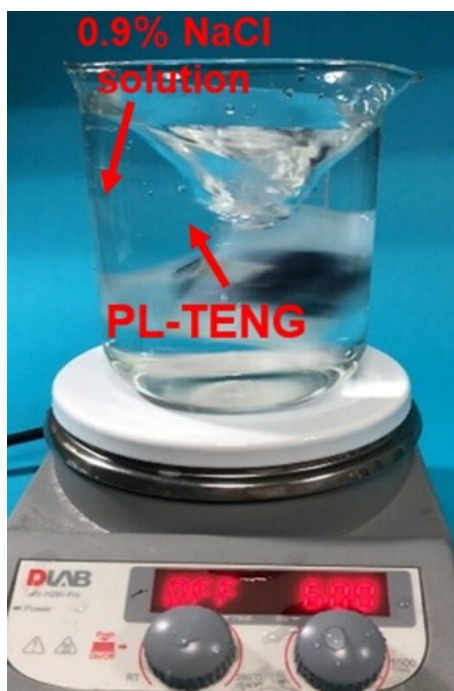

**Figure S4.** Washing PL-TENG in the saline (0.9% NaCl solution) using magnetic stirrer.

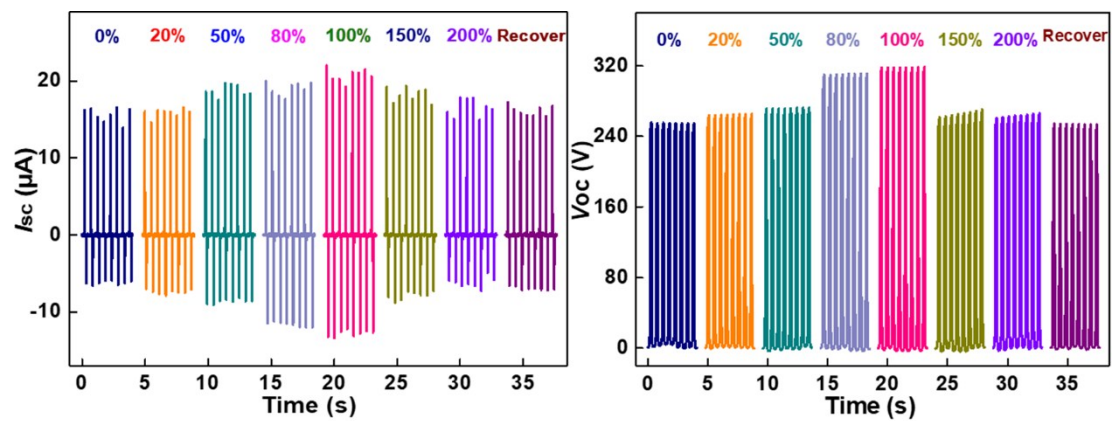

**Figure S5.** Electrical outputs of the PL-TENG under different elongations, including  $V_{oc}$  and  $I_{sc}$  respectively.

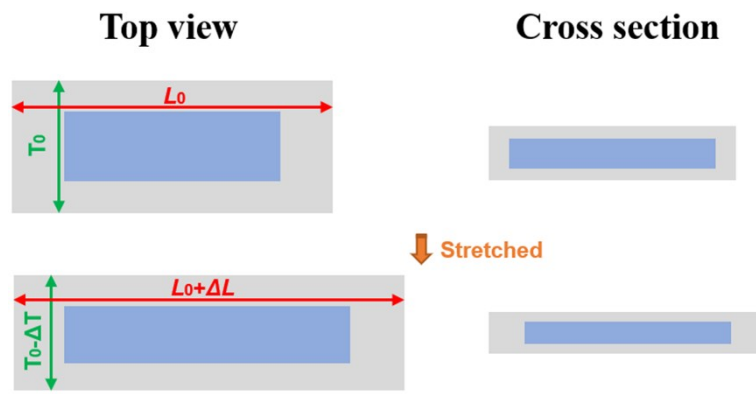

**Figure S6.** Schematic illustration of the deformation of the PL-TENG.

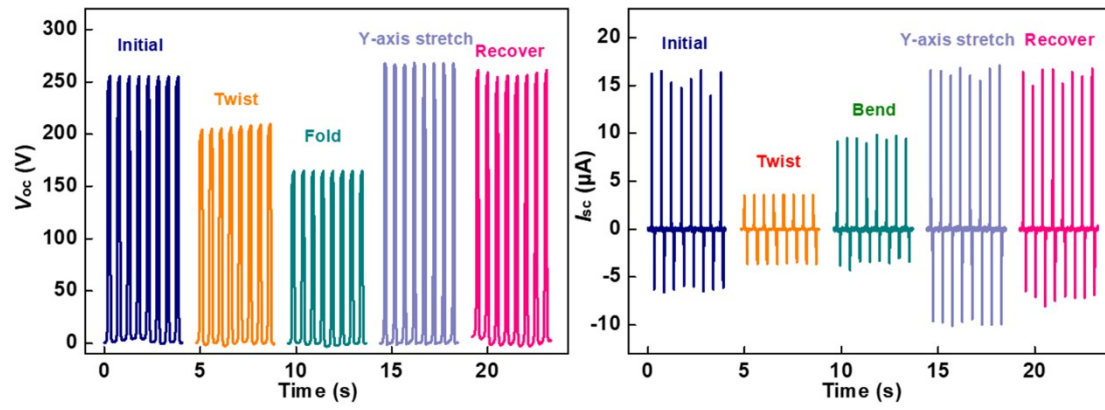

**Figure S7.**  $V_{oc}$  and  $I_{sc}$  of the PL-TENG under bended, twisted and stretched state, respectively.



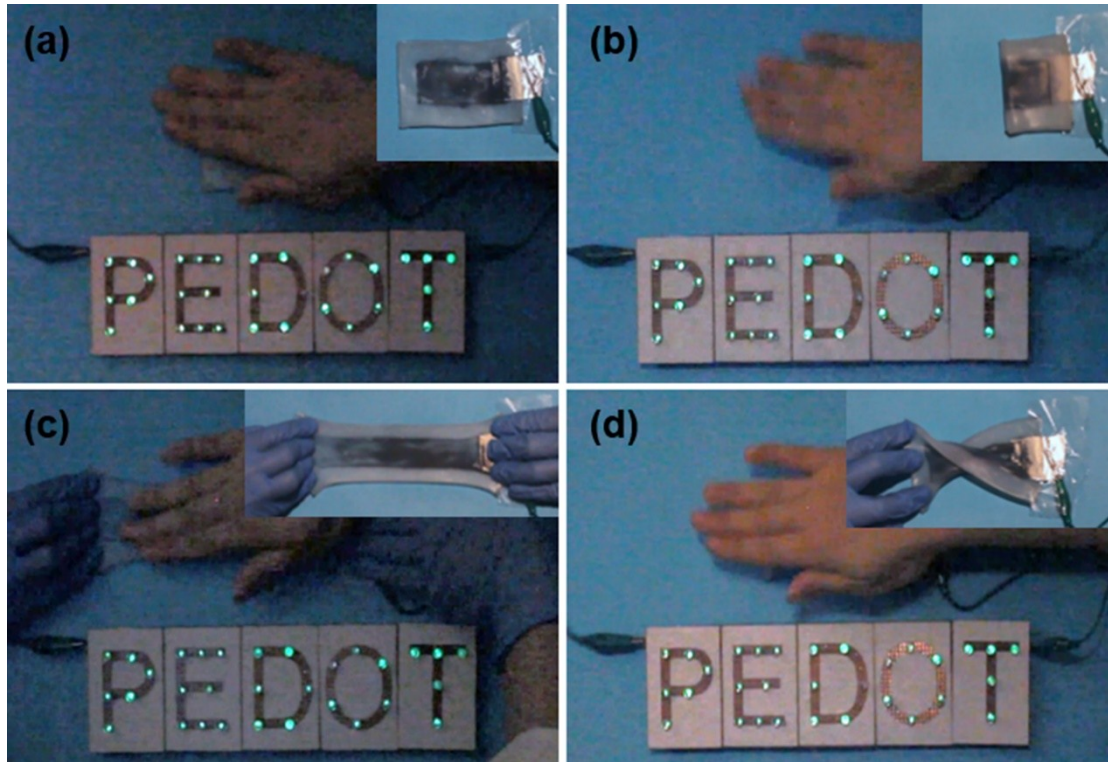

**Figure S8.** Driving several LEDs by harvesting mechanical energy from hand patting of the PL-TENG under different deformations including (a) original state (b) bended state. (c) stretched state and (d) twisted state.
